# Supplementary material
Source: publisher site journal article supplement (https://www.dovepress.com/article/370659)
Supplement: Supplementary file 1 [file get_supplementary_file.php]

**Supplementary Table S1**. Two-sample t-test with Bonferroni correction of BDI total scores between stations

| Comparison variables | N1 | N2 | *F*-test | | *t*-test | |
| --- | --- | --- | --- | --- | --- | --- |
| F statistics | Adjusted  *p*-value | T-statistics | Adjusted  *p*-value |
| BDI |  |  |  |  |  |  |
| Before departure | 45 | 42 | 0.295 | < 0.001 | -1.450 | 0.608 |
| Early winter | 45 | 43 | 0.678 | 0.836 | -1.566 | 0.484 |
| Late winter | 45 | 43 | 0.179 | < 0.001 | -3.067 | **0.013** |
| After return | 43 | 41 | 0.226 | < 0.003 | -2.823 | **0.026** |
| For BDI scores that were significantly different between the two stations in the LMM results in Table 4, a homogeneity of variance test using an F-test and a post hoc test using a t-test according to results of the homogeneity of variance test were performed. Two-sample *t*-test was performed for early winter where equal variance was established, and Welch’s two-sample t-test was performed for cases where equal variance was not established.  Bold indicates clinical significance (*p* < 0.05).  N1 = number of participants who completed questionnaires in the King Sejong Station; N2 = number of participants who completed questionnaires in the Jang Bogo Station.  Abbreviations: BDI, Beck Depression Inventory; LMM, linear mixed model | | | | | | |

**Supplementary Table S2**. Paired *t*-test with Bonferroni correction of ISI total score and sleep efficiency of PSQI between each time point

| Comparison variables | N | T statistics | Adjusted  p-value |
| --- | --- | --- | --- |
| ISI at King Sejong Station |  |  |  |
| Before departure vs Early winter | 45 | -3.761 | **< 0.001** |
| Before departure vs Late winter | 45 | -2.839 | **0.042** |
| Before departure vs After return | 44 | -1.435 | 0.954 |
| Early winter vs Late winter | 45 | 1.302 | 1 |
| Early winter vs After return | 44 | 2.947 | **0.03** |
| Late winter vs After return | 44 | 2.436 | 0.114 |
| ISI at Jang Bogo Station |  |  |  |
| Before departure vs Early winter | 43 | -2.887 | **0.036** |
| Before departure vs Late winter | 43 | -3.507 | **0.006** |
| Before departure vs After return | 41 | -1.870 | 0.414 |
| Early winter vs Late winter | 43 | 0.611 | 1 |
| Early winter vs After return | 41 | 1.345 | 1 |
| Late winter vs After return | 41 | 0.805 | 1 |
| PSQI SE at King Sejong Station |  |  |  |
| Before departure vs Early winter | 45 | 1.609 | 0.690 |
| Before departure vs Late winter | 45 | 2.215 | 0.192 |
| Before departure vs After return | 37 | 1.730 | 0.552 |
| Early winter vs Late winter | 45 | 0.732 | 1 |
| Early winter vs After return | 37 | 1.966 | 0.342 |
| Late winter vs After return | 37 | 1.060 | 1 |
| PSQI SE at Jang Bogo Station |  |  |  |
| Before departure vs Early winter | 43 | 2.432 | 0.114 |
| Before departure vs Late winter | 43 | 1.096 | 1 |
| Before departure vs After return | 37 | 3.384 | **0.012** |
| Early winter vs Late winter | 43 | -1.340 | 1 |
| Early winter vs After return | 37 | 0.120 | 1 |
| Late winter vs After return | 37 | 0.802 | 1 |
| Post-hoc *t*-test results only for the variables that were significant in the linear mixed model analysis in Table 4  Bold indicates clinical significance (*p* < 0.05).  Abbreviations: ISI, Insomnia Severity Index; N, number of subjects who completed the questionnaire; PSQI, Pittsburgh Sleep Quality Index, SE, sleep efficiency | | | |
